# Supplementary material for: Aproximación al concepto de honor en el Código Penal de 1995: (la controvertida cuestión de la falsedad como elemento del tipo objetivo de los delitos contra el honor)
Source: MDPI journal article supplement (doi:10.3390/v13060982), 1999-01-01
Supplement: s1 [file s1]

**Supplementary Table 2** Polymorphic sites in the L segment of ANG0206 (KWAV)

| Position in the L segment | Location in the L segment | Change  | Codon Change | Coverage  | Protein Effect | Amino Acid* Change | Variant Frequency |
|---------------------------|---------------------------|---------|--------------|-----------|----------------|--------------------|-------------------|
| 91                        | 5' end                    | T → C   | -            | 3548      | -              | -                  | 34.1%             |
| 673                       | L gene                    | T → C   | ACC → GCC    | 1399      | Substitution   | T → A              | 46%               |
| 790                       | L gene                    | T → C   | AGT → GGT    | 1487      | Substitution   | S → G              | 39.5%             |
| 890                       | L gene                    | T → C   | GAA → GAG    | 1442      | None           | -                  | 43.1%             |
| 1297                      | L gene                    | T → C   | ATT → GTT    | 2289      | Substitution   | I → V              | 38.4%             |
| 1322-1323                 | L gene                    | GG → AC | ACC → AGT    | 2097-2108 | Substitution   | T → S              | 33.3% - 33.4%     |
| 2160                      | L gene                    | A → G   | GTT → GCT    | 2104      | Substitution   | V → A              | 35.9%             |
| 2393                      | L gene                    | G → A   | TCC → TCT    | 2467      | None           | -                  | 33.8%             |
| 3971                      | L gene                    | G → A   | CAC → CAT    | 1758      | None           | -                  | 28.4%             |
| 4004                      | L gene                    | G → A   | TGC → TGT    | 2457      | None           | -                  | 37%               |
| 4121                      | L gene                    | C → T   | CAG → CAA    | 5400      | None           | -                  | 37.5%             |
| 4371                      | L gene                    | T → C   | AAA → AGA    | 3751      | Substitution   | K → R              | 36.6%             |
| 5687                      | L gene                    | T → C   | AAA → AAG    | 387       | None           | -                  | 39%               |
| 6023                      | L gene                    | C → T   | GTG → GTA    | 1604      | None           | -                  | 41.6%             |
| 6698                      | L gene                    | G → A   | GCC → GCT    | 806       | None           | -                  | 36.4%             |

\* A = Alanine, G = Glycine, I = Isoleucine, K = Lysine, R = Arginine, S = Serine, T = Threonine, V = Valine
