# Supplementary material for: Aproximación al concepto de honor en el Código Penal de 1995: (la controvertida cuestión de la falsedad como elemento del tipo objetivo de los delitos contra el honor)
Source: MDPI journal article supplement (doi:10.3390/v13060982), 1999-01-01
Supplement: s1 [file s1]

**Supplementary Table 1** PCR detection of mammarenavirus cDNA in Angolan small mammals

| Family          | Genus               | Species            | Capture Site           | Longitude | Latitude   | Altitude | Arenavirus Positive | Individuals Tested | Arenavirus Prevalence in % [95% CI] |
|-----------------|---------------------|--------------------|------------------------|-----------|------------|----------|---------------------|--------------------|-------------------------------------|
| Bathyergidae    | <i>Fukomys</i>      |                    | Hombe                  | 14.77175  | -14.90245  | 1261     | 0                   | 1                  | -                                   |
|                 |                     |                    | Tundavala              | 13.40352  | -14.81098  | 2283     | 0                   | 1                  | -                                   |
| Gliridae        | <i>Graphiurus</i>   |                    | Hombe                  | 14.77175  | -14.90245  | 1261     | 0                   | 2                  | -                                   |
|                 |                     |                    | Tundavala              | 13.40352  | -14.81098  | 2283     | 0                   | 1                  | -                                   |
| Macroscelididae | <i>Elephantulus</i> |                    | Caraculo               | 12.651958 | -15.027038 | 610      | 0                   | 3                  | -                                   |
|                 |                     |                    | Tundavala              | 13.40352  | -14.81098  | 2283     | 0                   | 6                  | -                                   |
| Muridae         | <i>Aethomys</i>     |                    | Kumbira                | 14.29293  | -11.15439  | 881      | 0                   | 14                 | -                                   |
|                 | <i>Dendromus</i>    |                    | 20 km SW of Cassongue  | 14.87526  | -11.91103  | 1752     | 0                   | 2                  | -                                   |
|                 | <i>Gerbilliscus</i> |                    | Arco oasis             | 12.064888 | -15.768228 | 43       | 0                   | 5                  | -                                   |
|                 |                     |                    | Bicuar National Park   | 14.83968  | -15.10135  | 1242     | 0                   | 6                  | -                                   |
|                 |                     |                    | Hombe                  | 14.77175  | -14.90245  | 1261     | 0                   | 1                  | -                                   |
|                 |                     |                    | Tundavala              | 13.40352  | -14.81098  | 2283     | 0                   | 13                 | -                                   |
|                 | <i>Hylomyscus</i>   |                    | 20 km SW of Cassongue  | 14.87526  | -11.91103  | 1752     | 0                   | 3                  | -                                   |
|                 | <i>Lophuromys</i>   |                    | Kumbira                | 14.29293  | -11.15439  | 881      | 0                   | 12                 | -                                   |
|                 |                     |                    | 20 km SW of Cassongue  | 14.87526  | -11.91103  | 1752     | 0                   | 2                  | -                                   |
|                 | <i>Mastomys</i>     | <i>angolensis</i>  | 20 km SW of Cassongue  | 14.87526  | -11.91103  | 1752     | 0                   | 17                 | -                                   |
|                 | <i>Mastomys</i>     | <i>natalensis</i>  | Arco oasis             | 12.064888 | -15.768228 | 43       | 0                   | 1                  | -                                   |
|                 |                     |                    | Bibala                 | 13.35047  | -14.75923  | 912      | 0                   | 7                  | -                                   |
|                 |                     |                    | Bicuar National Park   | 14.83968  | -15.10135  | 1242     | 1                   | 9                  | 11.1 [0.6-44.4]                     |
|                 |                     |                    | Conda                  | 14.31559  | -11.101137 | 925      | 0                   | 12                 | -                                   |
|                 |                     |                    | Hombe                  | 14.77175  | -14.90245  | 1261     | 0                   | 30                 | -                                   |
|                 |                     |                    | 20 km SW of Cassongue  | 14.87526  | -11.91103  | 1752     | 0                   | 1                  | -                                   |
|                 |                     |                    | Tundavala              | 13.40352  | -14.81098  | 2283     | 0                   | 34                 | -                                   |
|                 | <i>Micaelamys</i>   | <i>namaquensis</i> | Arco oasis             | 12.064888 | -15.768228 | 43       | 0                   | 10                 | -                                   |
|                 |                     |                    | Bibala                 | 13.35047  | -14.75923  | 912      | 6                   | 11                 | 54.5 [26.5-80]                      |
|                 |                     |                    | Caraculo               | 12.651958 | -15.027038 | 610      | 0                   | 3                  | -                                   |
|                 |                     |                    | 20 km SW of Cassongue  | 14.87526  | -11.91103  | 1752     | 0                   | 14                 | -                                   |
|                 |                     |                    | Tundavala              | 13.40352  | -14.81098  | 2283     | 15                  | 37                 | 40.5 [25.4-56.8]                    |
|                 | <i>Mus</i>          |                    | ISCED Lubango          | 13.48478  | -14.91724  | 1807     | 0                   | 1                  | -                                   |
|                 |                     |                    | Kumbira                | 14.29293  | -11.15439  | 881      | 0                   | 7                  | -                                   |
|                 |                     |                    | 20 km SW of Cassongue* | 14.87526  | -11.91103  | 1752     | 0                   | 4                  | -                                   |
|                 | <i>Mus</i>          | <i>triton</i>      | 20 km SW of Cassongue  | 14.87526  | -11.91103  | 1752     | 2                   | 6                  | 33.33 [6.3-72.9]                    |
|                 | <i>Petromyscus</i>  |                    | Caraculo               | 12.651958 | -15.027038 | 610      | 0                   | 2                  | -                                   |
|                 | <i>Rattus</i>       |                    | Conda                  | 14.31559  | -11.101137 | 925      | 0                   | 1                  | -                                   |
|                 |                     |                    | Kumbira                | 14.29293  | -11.15439  | 881      | 0                   | 4                  | -                                   |
|                 | <i>Rhabdomys</i>    |                    | Tundavala              | 13.40352  | -14.81098  | 2283     | 0                   | 3                  | -                                   |
|                 | <i>Steatomys</i>    |                    | Tundavala              | 13.40352  | -14.81098  | 2283     | 0                   | 1                  | -                                   |
|                 | <i>Thallomys</i>    |                    | Caraculo               | 12.651958 | -15.027038 | 610      | 0                   | 1                  | -                                   |
|                 |                     |                    | Hombe                  | 14.77175  | -14.90245  | 1261     | 0                   | 1                  | -                                   |
| Soricidae       | <i>Crociodura</i>   |                    | 20 km SW of Cassongue  | 14.87526  | -11.91103  | 1752     | 0                   | 1                  | -                                   |
| Total           |                     |                    |                        |           |            |          | 24                  | 290                | 8.3 [5.4-12]                        |

\* 2 *Mus cf. kasaicus*, 1 *Mus minutoides* (sensu Bryja *et al.* [65]; *cyt b* analysis) and 1 *Nannomys sp. indet.* (assumption based on morphology)
