# Supplementary material for: Aproximación al concepto de honor en el Código Penal de 1995: (la controvertida cuestión de la falsedad como elemento del tipo objetivo de los delitos contra el honor)
Source: MDPI journal article supplement (doi:10.3390/v13060982), 1999-01-01
Supplement: s1 [file s1]

**Supplementary Table 3a** PASC nucleotide sequence identities comparison of Angolan mammarenaviruses within Arenaviridae

| Sample  | nt sequence identity S<br>segment (in %) | The closest hit species -<br>Genbank # | nt sequence identity L<br>segment (in %) | The closest hit species -<br>Genbank # |
|---------|------------------------------------------|----------------------------------------|------------------------------------------|----------------------------------------|
| ANG0052 | 75.1                                     | Okahandja - NC027135                   | 71.6                                     | Okahandja - NC027137                   |
| ANG0070 | 76.1                                     | Okahandja - NC027135                   | 71.7                                     | Okahandja - NC027137                   |
| ANG0117 | 73.6                                     | Luna LSK2 - AB693148                   | 67.3                                     | Luna LSK1 - NC016153                   |
| ANG0206 | 74.5                                     | Mobala - NC007903                      | 67.5                                     | Mobala - NC007904                      |

**Supplementary Table 3b** Nucleotide sequence and amino acid identity comparison between ANG0117 and OW mammarenaviruses

| Virus        | Genbank #<br>S segment | GPC gene |             | NP gene |             | Genbank # L<br>segment | L gene |             | Z gene |             |
|--------------|------------------------|----------|-------------|---------|-------------|------------------------|--------|-------------|--------|-------------|
|              |                        | nt (%)   | aa (%)      | nt (%)  | aa (%)      |                        | nt (%) | aa (%)      | nt (%) | aa (%)      |
| Luna SLW-1   | AB972430               | 76.3     | 88.4        | 73.7    | <b>88.4</b> | AB972431               | 67.3   | 71.6        | 64.3   | 71.4        |
| Luna LSK-2   | AB693148               | 75.2     | 89.2        | 75.3    | 87.6        | AB693149               | 68.3   | 72.4        | 65.3   | <b>72.4</b> |
| Luna Zambezi | MG637234               | 75.6     | 87.4        | 74.1    | 87.2        | MG637235               | 67.0   | 70.9        | 67.0   | 70.4        |
| Luna LSK-1   | AB586644               | 75.4     | <b>89.4</b> | 74.0    | 87.2        | AB586645               | 68.8   | 72.5        | 66.0   | <b>72.4</b> |
| Luna LSK-3   | AB702940               | 73.9     | 88.6        | 73.9    | 87.0        | AB702941               | 68.7   | 72.5        | 64.6   | 68.4        |
| Luna LVN-1   | AB697691               | 75.7     | 88.4        | 74.8    | 87.0        | AB697692               | 67.8   | 72.0        | 66.7   | 70.4        |
| Luna NMW-1   | AB586646               | 75.2     | <b>89.4</b> | 74.3    | 86.6        | AB586647               | 68.7   | <b>72.8</b> | 64.3   | 69.4        |
| Mopeia       | AY772170               | 68.5     | 76.5        | 71.9    | 81.7        | AY772169               | 62.3   | 62.8        | 61.3   | 63.3        |
| Morogoro     | NC013057               | 68.9     | 79.6        | 70.3    | 81.0        | NC013058               | 61.9   | 62.3        | 56.6   | 59.2        |
| Dhati Welel  | MT078838               | 70.8     | 80.3        | 70.5    | 78.6        | MT078839               | 62.3   | 62.7        | 66.0   | 66.7        |
| Mobala       | AY342390               | 69.5     | 80.8        | 69.7    | 77.8        | DQ328876               | 63.1   | 63.2        | 60.8   | 63.5        |
| Gairo        | KJ855308               | 71.3     | 79.3        | 69.9    | 77.3        | KJ855307               | 62.7   | 63.2        | 61.0   | 59.1        |
| Lassa        | NC004296               | 67.2     | 75.4        | 69.0    | 75.5        | NC004297               | 59.3   | 57.3        | 58.4   | 58.3        |
| Wenzhou      | KJ909794               | 64.0     | 69.9        | 67.5    | 75.0        | KJ909795               | 57.3   | 54.0        | 60.7   | 61.3        |
| Loie River   | KC669697               | 64.6     | 70.1        | 65.3    | 73.0        | KC669692               | 57.5   | 54.6        | 62.1   | 63.2        |
| Ippy         | NC007905               | 67.6     | 73.0        | 65.9    | 72.5        | NC007906               | 57.8   | 55.3        | 58.9   | 58.5        |
| Solwezi      | AB972428               | 67.0     | 74.1        | 66.1    | 71.0        | AB972429               | 57.4   | 54.5        | 62.5   | 62.8        |
| Kitale       | MK935153               | 66.7     | 72.4        | 65.7    | 70.4        | MK935152               | 57.7   | 54.7        | 57.8   | 55.9        |
| Merino Walk  | GU078660               | 63.1     | 68.5        | 64.9    | 68.4        | GU078661               | 56.8   | 53.1        | 59.5   | 56.3        |
| Okahandja    | NC027135               | 63.5     | 67.8        | 65.1    | 67.3        | NC027137               | 55.9   | 51.3        | 55.3   | 56.3        |
| Dandenong    | EU136038               | 59.8     | 57.5        | 62.8    | 65.7        | EU136039               | 53.5   | 48.3        | 57.4   | 51.7        |
| LCMV         | DQ868485               | 57.5     | 56.7        | 62.1    | 65.7        | DQ868486               | 54.3   | 48.3        | 57.4   | 52.8        |
| Ryukyu       | KM020191               | 57.9     | 56.9        | 61.5    | 65.5        | KM020190               | 53.2   | 47.7        | 54.4   | 50.6        |
| Lunk         | NC018710               | 58.3     | 57.1        | 61.4    | 63.7        | NC018711               | 52.9   | 47.9        | 50.0   | 48.4        |
| Lujo         | NC012776               | 51.5     | 42.6        | 60.2    | 59.1        | NC012777               | 51.9   | 45.0        | 52.3   | 44.8        |

**Supplementary Table 3c** Nucleotide sequence and amino acid identity comparison between ANG0052 / ANG0070 and OW mammarenaviruses

| Virus       | Genbank # S segment | GPC gene    |                    | NP gene     |                    | Genbank # L segment | L gene      |                    | Z gene      |                    |
|-------------|---------------------|-------------|--------------------|-------------|--------------------|---------------------|-------------|--------------------|-------------|--------------------|
|             |                     | nt (%)      | aa (%)             | nt (%)      | aa (%)             |                     | nt (%)      | aa (%)             | nt (%)      | aa (%)             |
| in common   |                     | 80.0        | 89.8               | 82.7        | 92.0               |                     | 80.4        | 88.1               | 82.3        | 84.9               |
| Okahandja   | NC027135            | 74.2 / 75.4 | <b>84.5 / 84.2</b> | 76.2 / 76.7 | <b>85.9 / 87.2</b> | NC027137            | 73.0 / 73.1 | <b>79.8 / 79.3</b> | 72.4 / 71.7 | <b>78.3 / 76.1</b> |
| Merino Walk | GU078660            | 66.2 / 66.8 | 75.4 / 76.1        | 70.6 / 71.3 | 79.7 / 79.9        | GU078661            | 63.4 / 63.0 | 63.7 / 63.6        | 59.6 / 59.3 | 61.8 / 62.9        |
| Wenzhou     | KJ909794            | 61.6 / 61.3 | 62.2 / 64.2        | 66.5 / 66.2 | 69.8 / 70.7        | KJ909795            | 55.1 / 55.7 | 52.0 / 51.8        | 59.0 / 56.6 | 55.1 / 53.8        |
| Ippy        | NC007905            | 64.7 / 64.2 | 70.6 / 73.3        | 65.0 / 64.1 | 69.0 / 69.2        | NC007906            | 56.4        | 52.2 / 52.4        | 56.0 / 56.7 | 54.8               |
| Solwezi     | AB972428            | 65.3 / 64.5 | 69.5 / 71.6        | 64.8 / 64.2 | 68.6               | AB972429            | 56.1 / 56.2 | 53.3 / 52.7        | 57.3 / 56.6 | 54.3 / 53.3        |
| Mopeia      | AY772170            | 64.3 / 64.1 | 68.0 / 67.9        | 63.4 / 63.2 | 68.5 / 69.0        | AY772169            | 57.3 / 56.4 | 52.7 / 52.6        | 56.9 / 54.3 | 50.5 / 52.7        |
| Kitale      | MK935153            | 62.8 / 63.8 | 68.5 / 70.2        | 65.6 / 65.7 | 68.4 / 69.3        | MK935152            | 55.6 / 56.0 | 53.2 / 53.1        | 51.6 / 49.5 | 47.8 / 45.6        |
| Loie River  | KC669697            | 63.7 / 63.5 | 67.1 / 67.9        | 65.4 / 64.0 | 68.0 / 68.9        | KC669692            | 56.7 / 56.6 | 53.7 / 53.3        | 59.4 / 61.2 | 56.0 / 58.2        |
| Lassa       | NC004296            | 65.7 / 66.4 | 69.3 / 69.0        | 63.9 / 63.8 | 67.8 / 68.3        | NC004297            | 56.6        | 52.2 / 51.9        | 61.4 / 56.8 | 63.2 / 60.9        |
| Morogoro    | NC013057            | 63.7 / 65.9 | 67.2 / 68.7        | 64.1 / 64.3 | 67.8 / 68.3        | NC013058            | 56.6 / 55.9 | 52.7 / 52.6        | 52.2 / 52.9 | 50.5               |
| Dhati Welel | MT078838            | 63.4 / 65.6 | 68.0 / 69.1        | 64.7 / 64.6 | 67.8 / 68.1        | MT078839            | 56.9 / 56.2 | 53.0 / 52.4        | 60.8 / 59.0 | 58.9 / 60.0        |
| Gairo       | KJ855308            | 64.2 / 65.3 | 67.6 / 69.0        | 64.4 / 63.5 | 67.6 / 66.8        | KJ855307            | 57.2 / 57.5 | 52.9 / 53.1        | 54.6 / 57.1 | 48.9 / 51.1        |
| Luna        | AB586644            | 64.9 / 65.4 | 68.0 / 68.4        | 63.1 / 63.9 | 67.4 / 68.1        | AB586645            | 56.2 / 56.7 | 51.8 / 52.2        | 60.3 / 56.2 | 55.7 / 56.8        |
| Dandenong   | EU136038            | 59.1 / 59.2 | 57.0 / 57.7        | 63.5 / 62.5 | 66.2 / 66.7        | EU136039            | 52.2        | 46.2               | 58.7 / 54.9 | 55.2               |
| Mobala      | AY342390            | 63.5 / 64.1 | 67.1 / 68.6        | 64.1 / 64.3 | 66.1 / 67.0        | DQ328876            | 57.2 / 57.1 | 52.9 / 53.0        | 58.2 / 60.1 | 60.0 / 58.9        |
| Ryukyu      | KM020191            | 58.3 / 58.1 | 54.5 / 56.0        | 63.4 / 62.2 | 65.6               | KM020190            | 52.6 / 52.9 | 46.4 / 46.7        | 58.0 / 54.5 | 57.5               |
| LCMV        | DQ868485            | 59.1 / 59.3 | 56.2 / 56.9        | 63.3 / 62.2 | 65.3 / 65.6        | DQ868486            | 52.3        | 46.3 / 47.1        | 57.2 / 54.2 | 51.7               |
| Lunk        | NC018710            | 58.7 / 58.0 | 55.7 / 55.9        | 63.1 / 62.5 | 64.7 / 66.0        | NC018711            | 51.5 / 52.0 | 46.6 / 46.5        | 54.8 / 51.5 | 49.4               |
| Lujo        | NC012776            | 51.0 / 50.4 | 42.8 / 42.6        | 60.9 / 61.3 | 59.9 / 59.4        | NC012777            | 51.8 / 51.1 | 45.1               | 52.0 / 48.4 | 40.2 / 39.1        |

**Supplementary Table 3d** Nucleotide sequence and amino acid identity comparison between ANG0206 and OW mammarenaviruses

| Virus       | Genbank #<br>S segment | GPC gene |             | NP gene |             | Genbank # L<br>segment | L gene |             | Z gene |             |
|-------------|------------------------|----------|-------------|---------|-------------|------------------------|--------|-------------|--------|-------------|
|             |                        | nt (%)   | aa (%)      | nt (%)  | aa (%)      |                        | nt (%) | aa (%)      | nt (%) | aa (%)      |
| Mobala      | AY342390               | 75.4     | 85.1        | 76.7    | <b>88.0</b> | DQ328876               | 69.5   | <b>74.3</b> | 69.7   | <b>62.6</b> |
| Gairo       | KJ855308               | 73.0     | 83.0        | 73.0    | 84.9        | KJ855307               | 68.4   | 72.2        | 64.3   | 61.5        |
| Dhati Welel | MT078838               | 74.6     | <b>85.7</b> | 72.9    | 84.3        | MT078839               | 68.5   | 71.4        | 61.2   | 61.6        |
| Mopeia      | AY772170               | 68.5     | 78.1        | 71.4    | 78.6        | AY772169               | 64.0   | 64.1        | 60.6   | 56.1        |
| Luna        | AB586644               | 71.7     | 80.4        | 70.8    | 78.7        | AB586645               | 62.7   | 63.3        | 62.9   | 57.7        |
| Morogoro    | NC013057               | 70.2     | 79.4        | 71.8    | 77.9        | NC013058               | 62.0   | 62.5        | 56.2   | 55.1        |
| Lassa       | NC004296               | 68.4     | 77.8        | 68.8    | 73.4        | NC004297               | 60.0   | 58.7        | 62.9   | 58.3        |
| Wenzhou     | KJ909794               | 65.5     | 72.1        | 66.6    | 71.4        | KJ909795               | 57.6   | 55.0        | 60.5   | 59.0        |
| Loie River  | KC669697               | 66.7     | 73.5        | 65.9    | 70.2        | KC669692               | 57.2   | 54.9        | 58.2   | 61.1        |
| Solwezi     | AB972428               | 67.9     | 74.8        | 65.0    | 68.9        | AB972429               | 57.9   | 55.3        | 64.6   | 62.5        |
| Ippy        | NC007905               | 65.7     | 72.3        | 64.2    | 68.6        | NC007906               | 58.1   | 56.0        | 59.9   | 58.8        |
| Kitale      | MK935153               | 66.5     | 71.7        | 64.1    | 68.3        | MK935152               | 57.0   | 55.3        | 59.8   | 59.4        |
| Merino Walk | GU078660               | 64.8     | 69.7        | 63.8    | 65.9        | GU078661               | 57.0   | 52.9        | 55.9   | 52.8        |
| Okahandja   | NC027135               | 64.2     | 67.9        | 63.6    | 65.7        | NC027137               | 56.2   | 52.1        | 57.4   | 58.4        |
| Dandenong   | EU136038               | 59.1     | 59.2        | 61.9    | 63.5        | EU136039               | 53.4   | 47.7        | 57.1   | 50.0        |
| Lunk        | NC018710               | 59.0     | 57.1        | 61.3    | 63.3        | NC018711               | 53.1   | 48.3        | 55.0   | 47.3        |
| LCMV        | DQ868485               | 59.1     | 58.6        | 61.9    | 62.9        | DQ868486               | 54.1   | 47.9        | 55.3   | 47.8        |
| Ryukyu      | KM020191               | 60.1     | 58.8        | 59.8    | 61.9        | KM020190               | 52.9   | 47.2        | 54.2   | 48.9        |
| Lujo        | NC012776               | 51.0     | 44.2        | 60.7    | 60.1        | NC012777               | 52.1   | 45.5        | 49.6   | 40.4        |
