# Supplementary figures and images for: Aproximación al concepto de honor en el Código Penal de 1995: (la controvertida cuestión de la falsedad como elemento del tipo objetivo de los delitos contra el honor)
Source: MDPI journal article supplement (doi:10.3390/v13060982), 1999-01-01

a) detailed BITV phylogeny

GPC gene

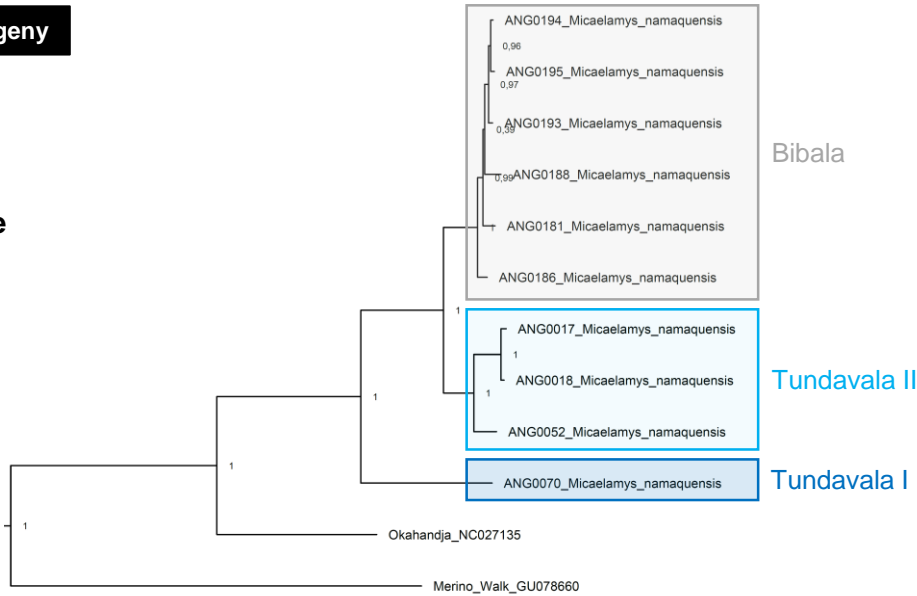

NP gene

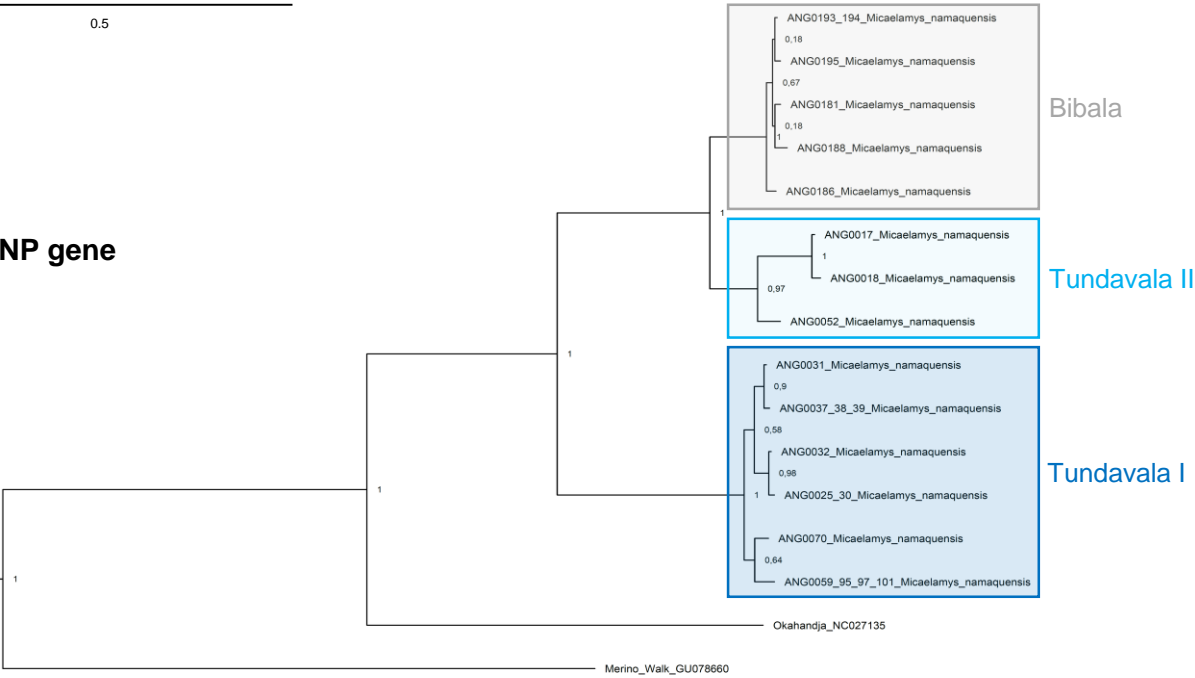

L gene

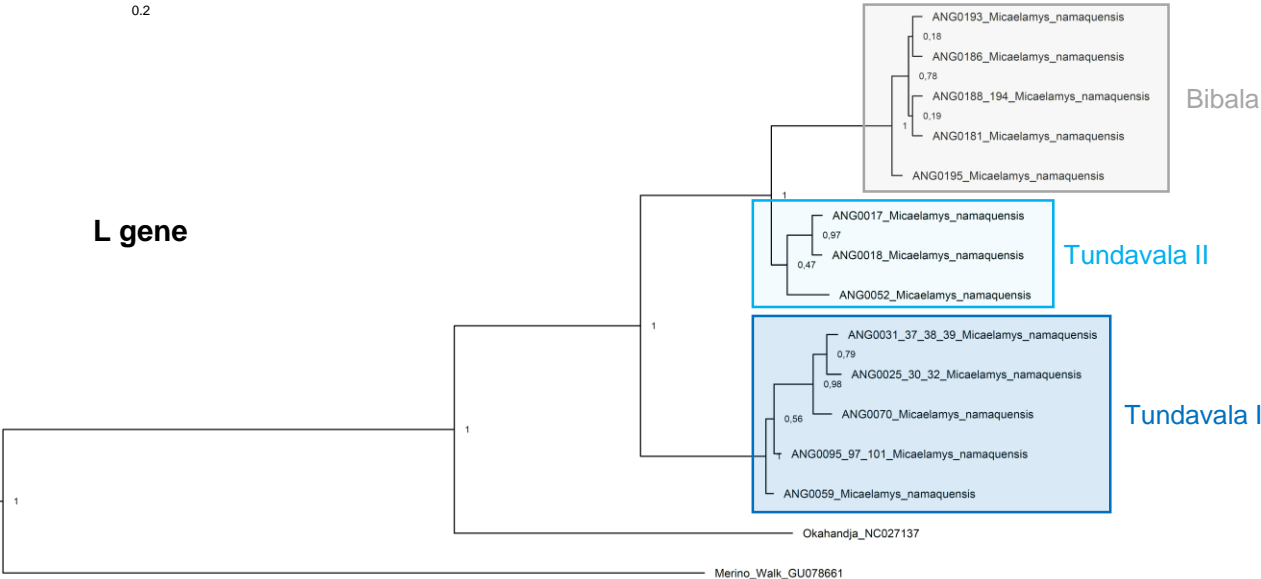

## b) Angolan Escarpment

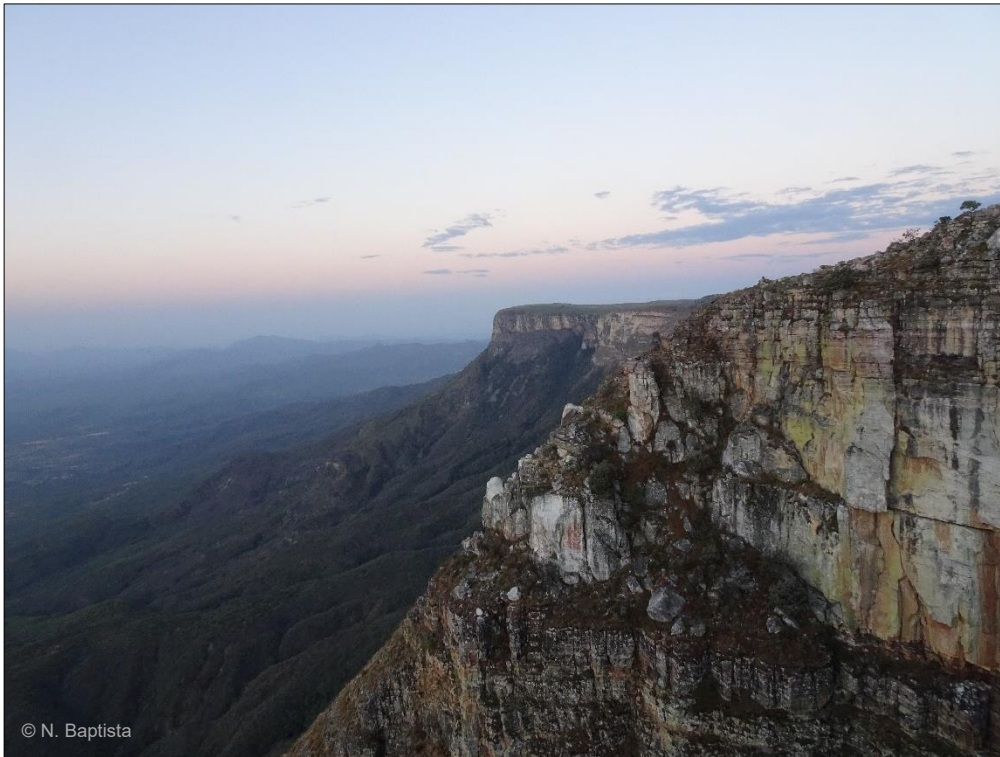

© N. Baptista

Supplement: s1 [file s1]
